# Supplementary material
Source: publisher figshare collection journal article supplement (https://tandf.figshare.com/ndownloader/files/7301918)
Supplement: Supplementary file 1 [file 7301918]

## Sheet: Sheet1
		NASS CDL (Resampled)
		Corn	Cotton	Sorghum	Soybeans	Spring Wheat	Winter Wheat	Alfalfa	Other Hay/Non-Alfalfa	Fallow/Idle Cropland	Other	Total	User's Accuracy (%)
Modeled Crop Classification	Corn	3683949	14238	35038	1042548	23509	73854	47740	31298	35636	555635	5543445	66.4559
	Cotton	12653	405366	11626	16912	80	23227	2210	2106	9770	69901	553851	73.1904
	Sorghum	20695	11591	183085	7396	139	34562	1363	1455	18663	45214	324163	56.4793
	Soybeans	776850	21289	10891	2312794	24998	32102	13199	20195	16109	345234	3573661	64.7178
	Spring Wheat	20449	7	181	27853	408093	14748	4577	7119	25385	152452	660864	61.7514
	Winter Wheat	50133	20566	50370	27478	17836	1251891	21538	8340	119216	256552	1823920	68.6374
	Alfalfa	17929	2490	1412	3348	4259	14218	244768	18905	6690	82304	396323	61.7597
	Other Hay/Non-Alfalfa	9789	131	465	7666	3279	4410	14130	172320	1643	52480	266313	64.7058
	Fallow/Idle Cropland	21795	2485	17272	6655	29892	104296	4134	2508	535936	133119	858092	62.4567
	Other	1601788	196392	98561	1206738	237226	454808	463362	933549	450143	11825910	17468477	67.6986
	Total	6216030	674555	408901	4659388	749311	2008116	817021	1197795	1219191	13518801	31469109
	Producer's Accuracy (%)	59.2653	60.0938	44.7749	49.6373	54.4624	62.3416	29.9586	14.3864	43.9583	87.4775		66.8087
